# Supplementary material for: Atypical, Composite, or Blended Phenotypes: How Different Molecular Mechanisms Could Associate in Double-Diagnosed Patients
Source: MDPI journal article supplement (doi:10.3390/genes13071275), 2022-07-19
Supplement: s1 [file s1]

Supplementary Table S1. Supporting criteria for classification of variants identified with trio-WES in our cases.

| Case            | Gene                               | Variant                                      | Heterozygosity                                | GnomAD<br>MAF | ClinVar    | Literature                     | ACMG criteria [10]      | ACMG<br>classification [10] |
|-----------------|------------------------------------|----------------------------------------------|-----------------------------------------------|---------------|------------|--------------------------------|-------------------------|-----------------------------|
| Case 1          | <i>SLC26A2</i><br>OMIM<br>*606718  | NM_000112.4<br>c.835C>T<br>p.Arg279Trp       | homozygous                                    | 271/282628    | Pathogenic | Hastbacka et<br>al.(1996) [27] | PS1;PS3;PM1;PP3;PP5     | Pathogenic                  |
|                 | <i>IFT27</i><br>OMIM<br>*615870    | NM_006860.4<br>c.350G>A<br>p.Gly117Asp       | homozygous                                    | 0             | NA         | NA                             | PM1;PM2;PP2;PP3         | Likely pathogenic           |
| Case 2<br>and 3 | <i>DNAI1</i><br>OMIM<br>*604366    | NM_012144.4<br>c.1952G>A<br>p.Gly651Glu      | homozygous                                    | 0             | NA         | NA                             | PM1;PM2;PP3;PP4         | Likely pathogenic           |
|                 | <i>TJP2</i><br>OMIM<br>*607709     | NM_004817.4<br>c.1594G>A<br>p.Gly532Arg      | homozygous                                    | 2/1211386     | Pathogenic | NA                             | PM1;PM2;PP3;PP5         | Likely pathogenic           |
| Case 4          | <i>DCLRE1C</i><br>OMIM<br>*605988  | NM_001033855.3<br>c.95C>G<br>p.Ser32Cys      | homozygous                                    | 1/250754      | NA         | Le Deist et<br>al.(2004) [16]  | PS1;PS3;PM1;PM2;PP<br>3 | Pathogenic                  |
|                 | <i>ATM</i><br>OMIM<br>*607585      | NM_000051.4<br>c.6472_6473del<br>p.Met2158fs | homozygous                                    | 0             | NA         | NA                             | PVS1;PM2                | Likely pathogenic           |
| Case 5          | <i>GRIN2B</i><br>OMIM<br>*138252   | NM_000834.5<br>c.1246T>C<br>p.Phe416Leu      | heterozygous, de<br>novo                      | 0             | NA         | NA                             | PS2;PM2;PP3;BP4         | Likely pathogenic           |
|                 | <i>SLC25A12</i><br>OMIM<br>*603667 | NM_003705.5<br>c.116_117del<br>p.Phe39fs     | heterozygous, de<br>novo (maternal<br>allele) | 0             | NA         | NA                             | PS2;PM2                 | Likely pathogenic           |

|        |                          |                                           |                           |          |    |                               |                 |                   |
|--------|--------------------------|-------------------------------------------|---------------------------|----------|----|-------------------------------|-----------------|-------------------|
|        |                          | NM_003705.5<br>c.1757G>A<br>p.Arg586Gln   | heterozygous,<br>paternal | 2/282776 | NA | NA                            | PM1;PM2;PM3;PP3 | Likely pathogenic |
| Case 6 | OTOA<br>OMIM<br>*607038  | NM_144672.4<br>c.605G>A<br>p.Arg202Gln    | heterozygous,<br>paternal | 7/251128 | NA | NA                            | PM2;BP4         | VUS               |
|        |                          | NM_144672.4<br>c.965C>T<br>p.Thr322Ile    | heterozygous,<br>maternal | 0        | NA | NA                            | PM2;BP4         | VUS               |
| Case 7 | CLN6<br>OMIM<br>*606725  | NM_017882.3<br>c.424dup<br>p.Tyr142fs     | homozygous                | 0        | NA | Berkovic et<br>al.(2019) [28] | PVS1;PS4;PM2    | Pathogenic        |
| Case 8 | TNPO2<br>OMIM<br>*603002 | NM_001136196.2<br>c.313C>T<br>p.Arg105ter | heterozygous, de<br>novo  | 0        | NA | NA                            | PS2;PM2         | Likely pathogenic |

Abbreviations: BP: benign supporting; MAF: minor allele frequency; NA: not available; PM: pathogenic moderate; PP: pathogenic supporting; PS: pathogenic strong; PVS: pathogenic very strong; VUS: variant of unknown significance.

## References

- Richards, S.; Aziz, N.; Bale, S.; Bick, D.; Das, S.; Gastier-Foster, J.; Grody, W.W.; Hegde, M.; Lyon, E.; Spector, E.; et al. Standards and guidelines for the interpretation of sequence variants: A joint consensus recommendation of the American College of Medical Genetics and Genomics and the Association for Molecular Pathology. *Genet. Med.* **2015**, *17*, 405–424. <https://doi.org/10.1038/gim.2015.30>.
- Le Deist, F.; Poinsignon, C.; Moshous, D.; Fischer, A.; de Villartay, J.P. Artemis sheds new light on V(D)J recombination. *Immunol. Rev.* **2004**, *200*, 142–155. <https://doi.org/10.1111/j.0105-2896.2004.00169.x>.
- Hästbacka, J.; Superti-Furga, A.; Wilcox, W.R.; Rimoin, D.L.; Cohn, D.H.; Lander, E.S. Atelosteogenesis type II is caused by mutations in the diastrophic dysplasia sulfate-transporter gene (DTDST): evidence for a phenotypic series involving three chondrodysplasias. *Am. J. Hum. Genet.* **1996**, *58*, 255–62.
- Berkovic, S.F.; Oliver, K.L.; Canafoglia, L.; Krieger, P.; Damiano, J.A.; Hildebrand, M.S.; Morbin, M.; Vears, D.F.; Sofia, V.; Giuliano, L.; et al. Kufs disease due to mutation of CLN6: clinical, pathological and molecular genetic features. *Brain* **2019**, *142*, 59–69. <https://doi.org/10.1093/brain/awy297>.
